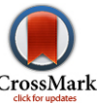

## Correction

# Correction: Suramin: A Potential Therapy for Diabetic Nephropathy

## The PLOS ONE Staff

The second author's name is spelled incorrectly. The correct name is: Lauren A. Howell. The correct citation is: Korrapati MC, Howell LA, Shaner BE, Megyesi JK, Siskind LJ, et al. (2013) Suramin: A Potential Therapy for Diabetic Nephropathy. PLoS ONE 8(9): e73655. doi:10.1371/journal.pone.0073655

The Author Contributions should read: Conceived and designed the experiments: MCK LJS RGS. Performed the experiments: MCK LAH BES. Analyzed the data: MCK LAH JKM LJS RGS. Wrote the paper: MCK LJS RGS.

## Reference

1. Korrapati MC, Howell LH, Shaner BE, Megyesi JK, Siskind LJ, et al. (2013) Suramin: A Potential Therapy for Diabetic Nephropathy. PLoS ONE 8(9): e73655. doi:10.1371/journal.pone.0073655

**Citation:** The PLOS ONE Staff (2014) Correction: Suramin: A Potential Therapy for Diabetic Nephropathy. PLoS ONE 9(11): e114426. doi:10.1371/journal.pone.0114426

**Published:** November 19, 2014

**Copyright:** © 2014 The PLOS ONE Staff. This is an open-access article distributed under the terms of the Creative Commons Attribution License, which permits unrestricted use, distribution, and reproduction in any medium, provided the original author and source are credited.
